# Supplementary figures and images for: Determination of oligomeric states of proteins via dual-color colocalization with single molecule localization microscopy
Source: eLife journal article supplement (doi:10.7554/elife.76631), 2022-10-07

monomer

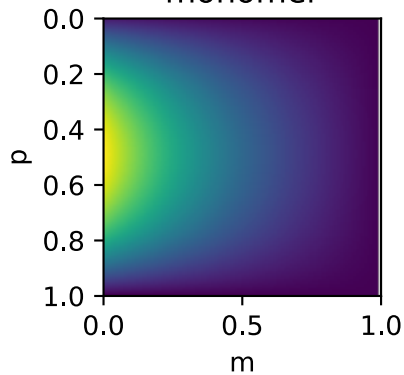

dimer

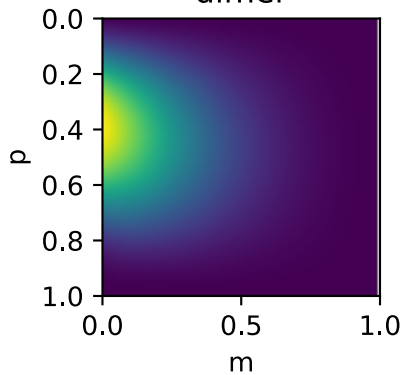

trimer

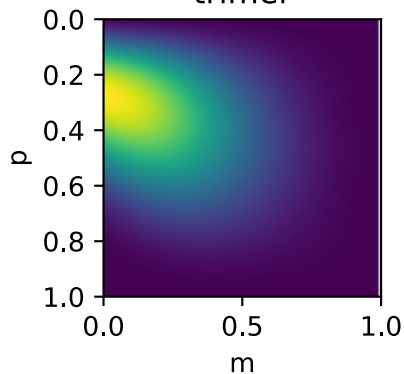

tetramer

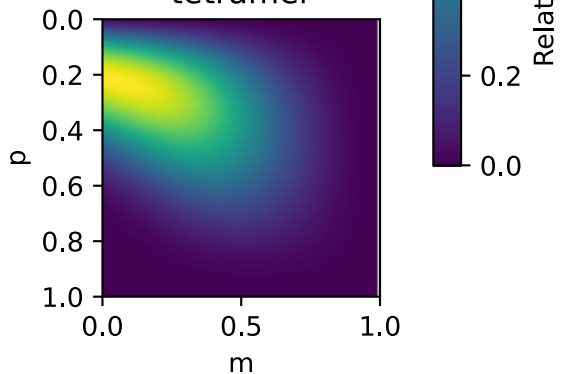

Supplement: supp [file elife_poa_e76631_Figure_1_figure_supplement_1.pdf › elife_poa_e76631_Figure_1_figure_supplement_1.pdf]

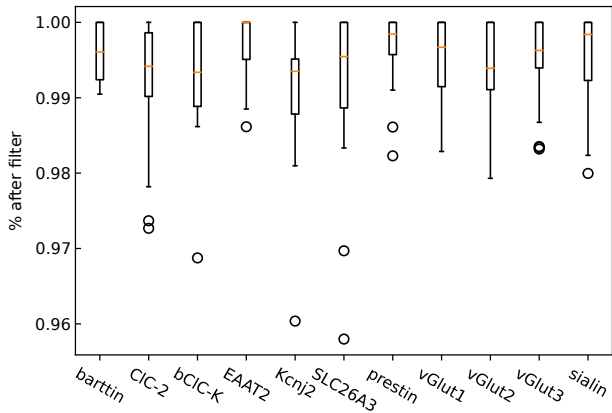

Supplement: supp [file elife_poa_e76631_Figure_1_figure_supplement_2.pdf › elife_poa_e76631_Figure_1_figure_supplement_2.pdf]

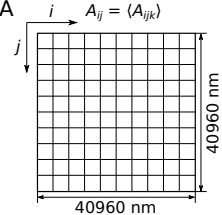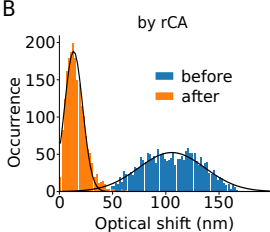

Supplement: supp [file elife_poa_e76631_Figure_2_figure_supplement_1.pdf › elife_poa_e76631_Figure_2_figure_supplement_1.pdf]

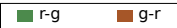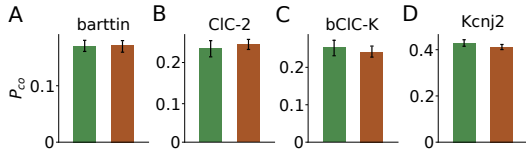

Supplement: supp [file elife_poa_e76631_Figure_3_figure_supplement_1.pdf › elife_poa_e76631_Figure_3_figure_supplement_1.pdf]

$M^2(n)$ 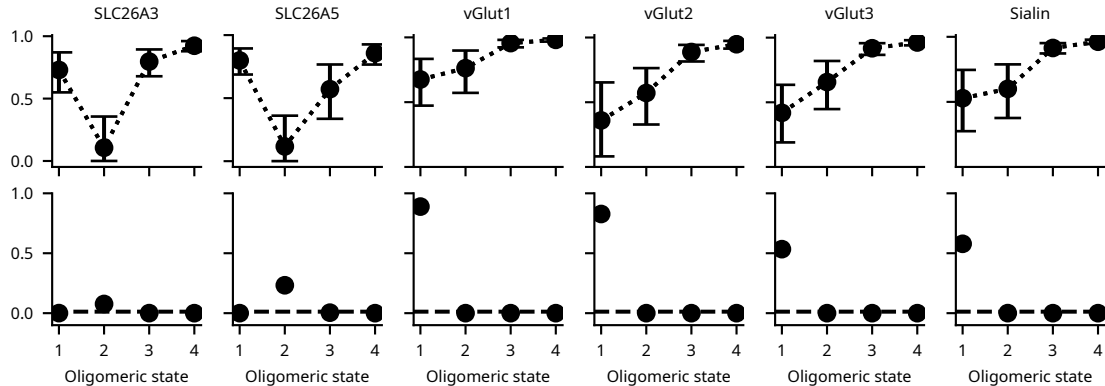

Supplement: supp [file elife_poa_e76631_Figure_4_figure_supplement_1.pdf › elife_poa_e76631_Figure_4_figure_supplement_1.pdf]

**A**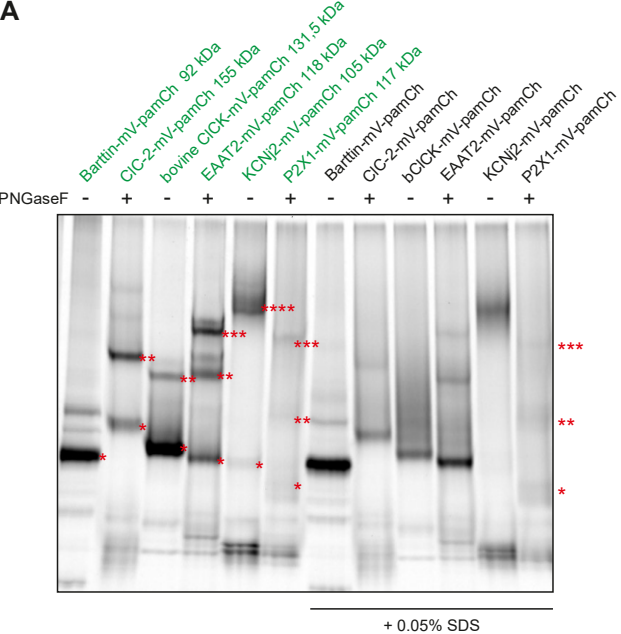**B**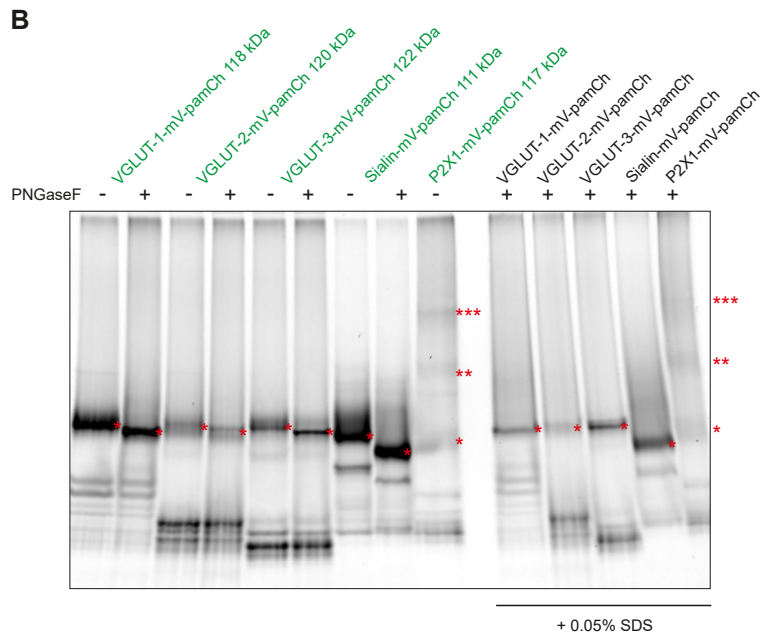**C**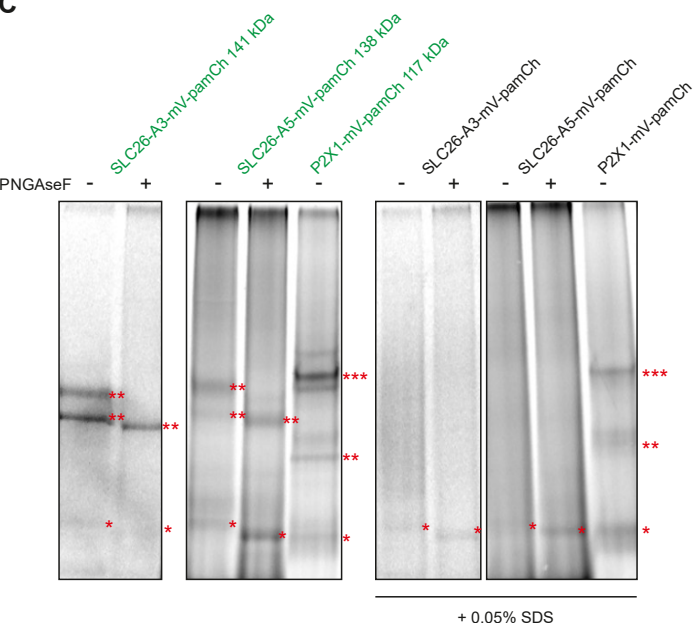

Supplement: supp [file elife_poa_e76631_Figure_4_figure_supplement_2.pdf › elife_poa_e76631_Figure_4_figure_supplement_2.pdf]

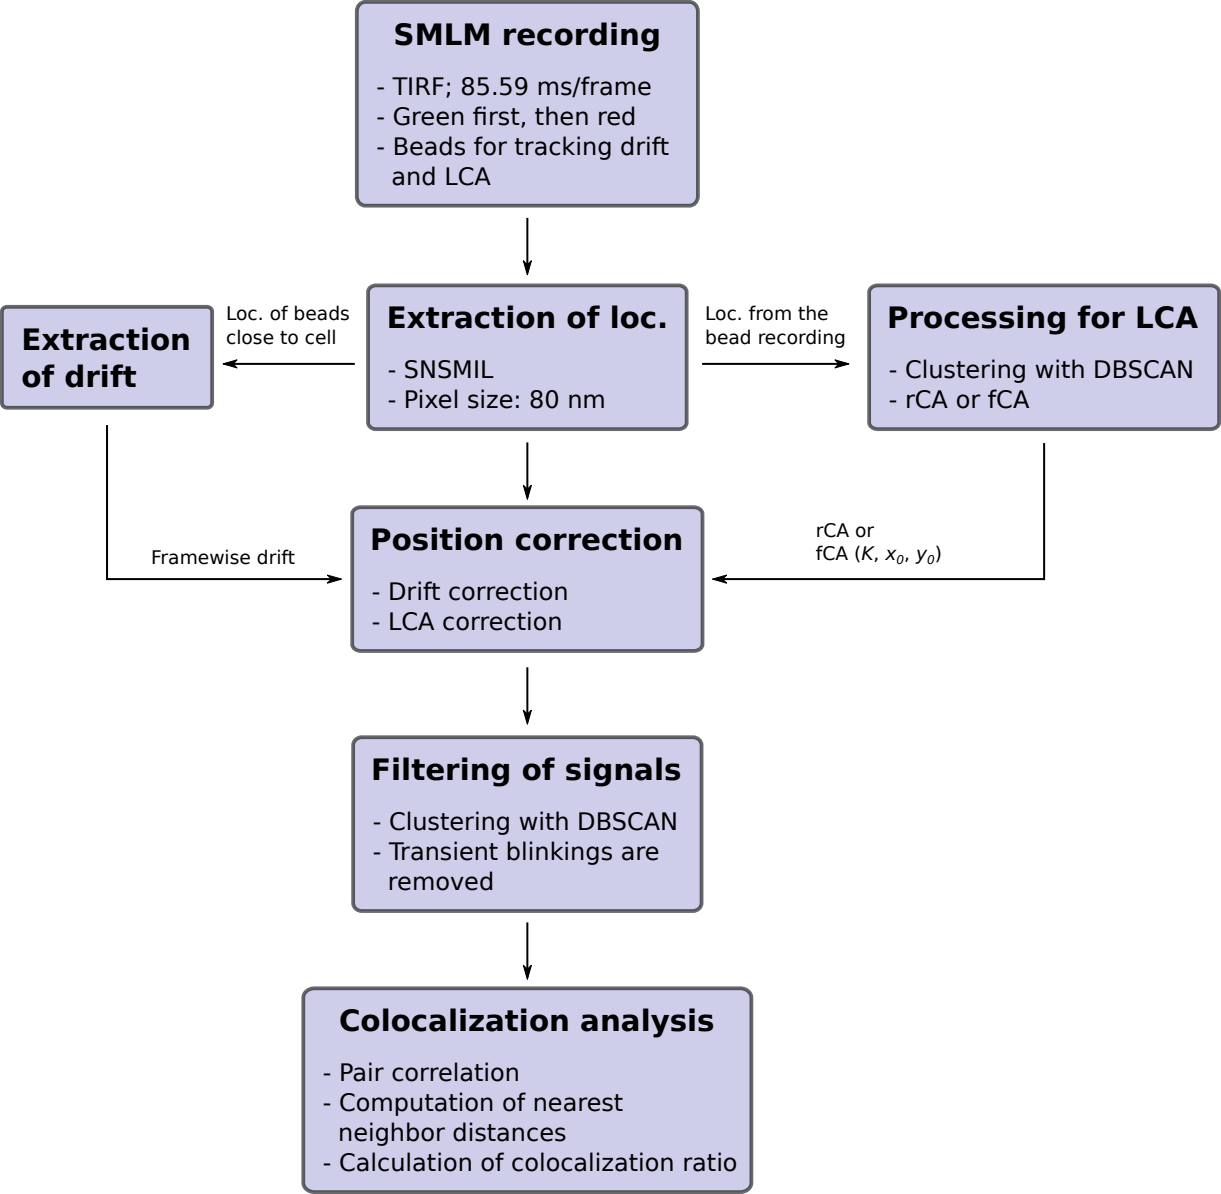

Supplement: supp [file elife_poa_e76631_Figure_4_figure_supplement_3.pdf › elife_poa_e76631_Figure_4_figure_supplement_3.pdf]

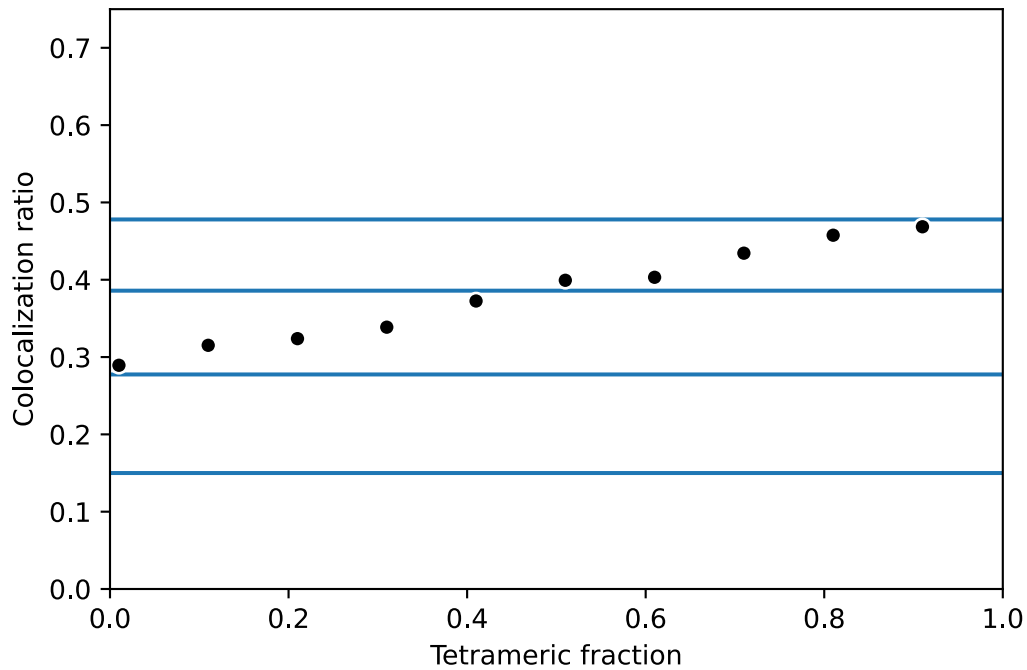

Supplement: supp [file elife_poa_e76631_Figure_4_figure_supplement_4.pdf › elife_poa_e76631_Figure_4_figure_supplement_4.pdf]

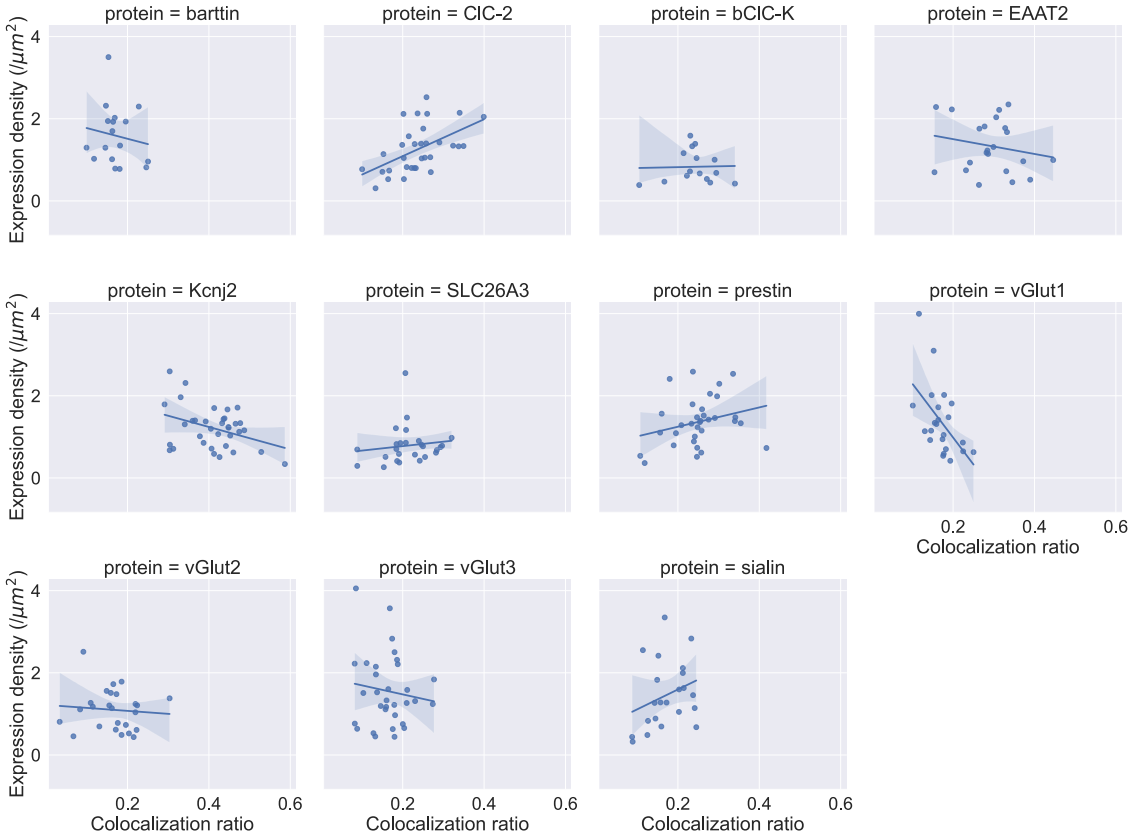

Supplement: supp [file elife_poa_e76631_Figure_4_figure_supplement_5.pdf › elife_poa_e76631_Figure_4_figure_supplement_5.pdf]

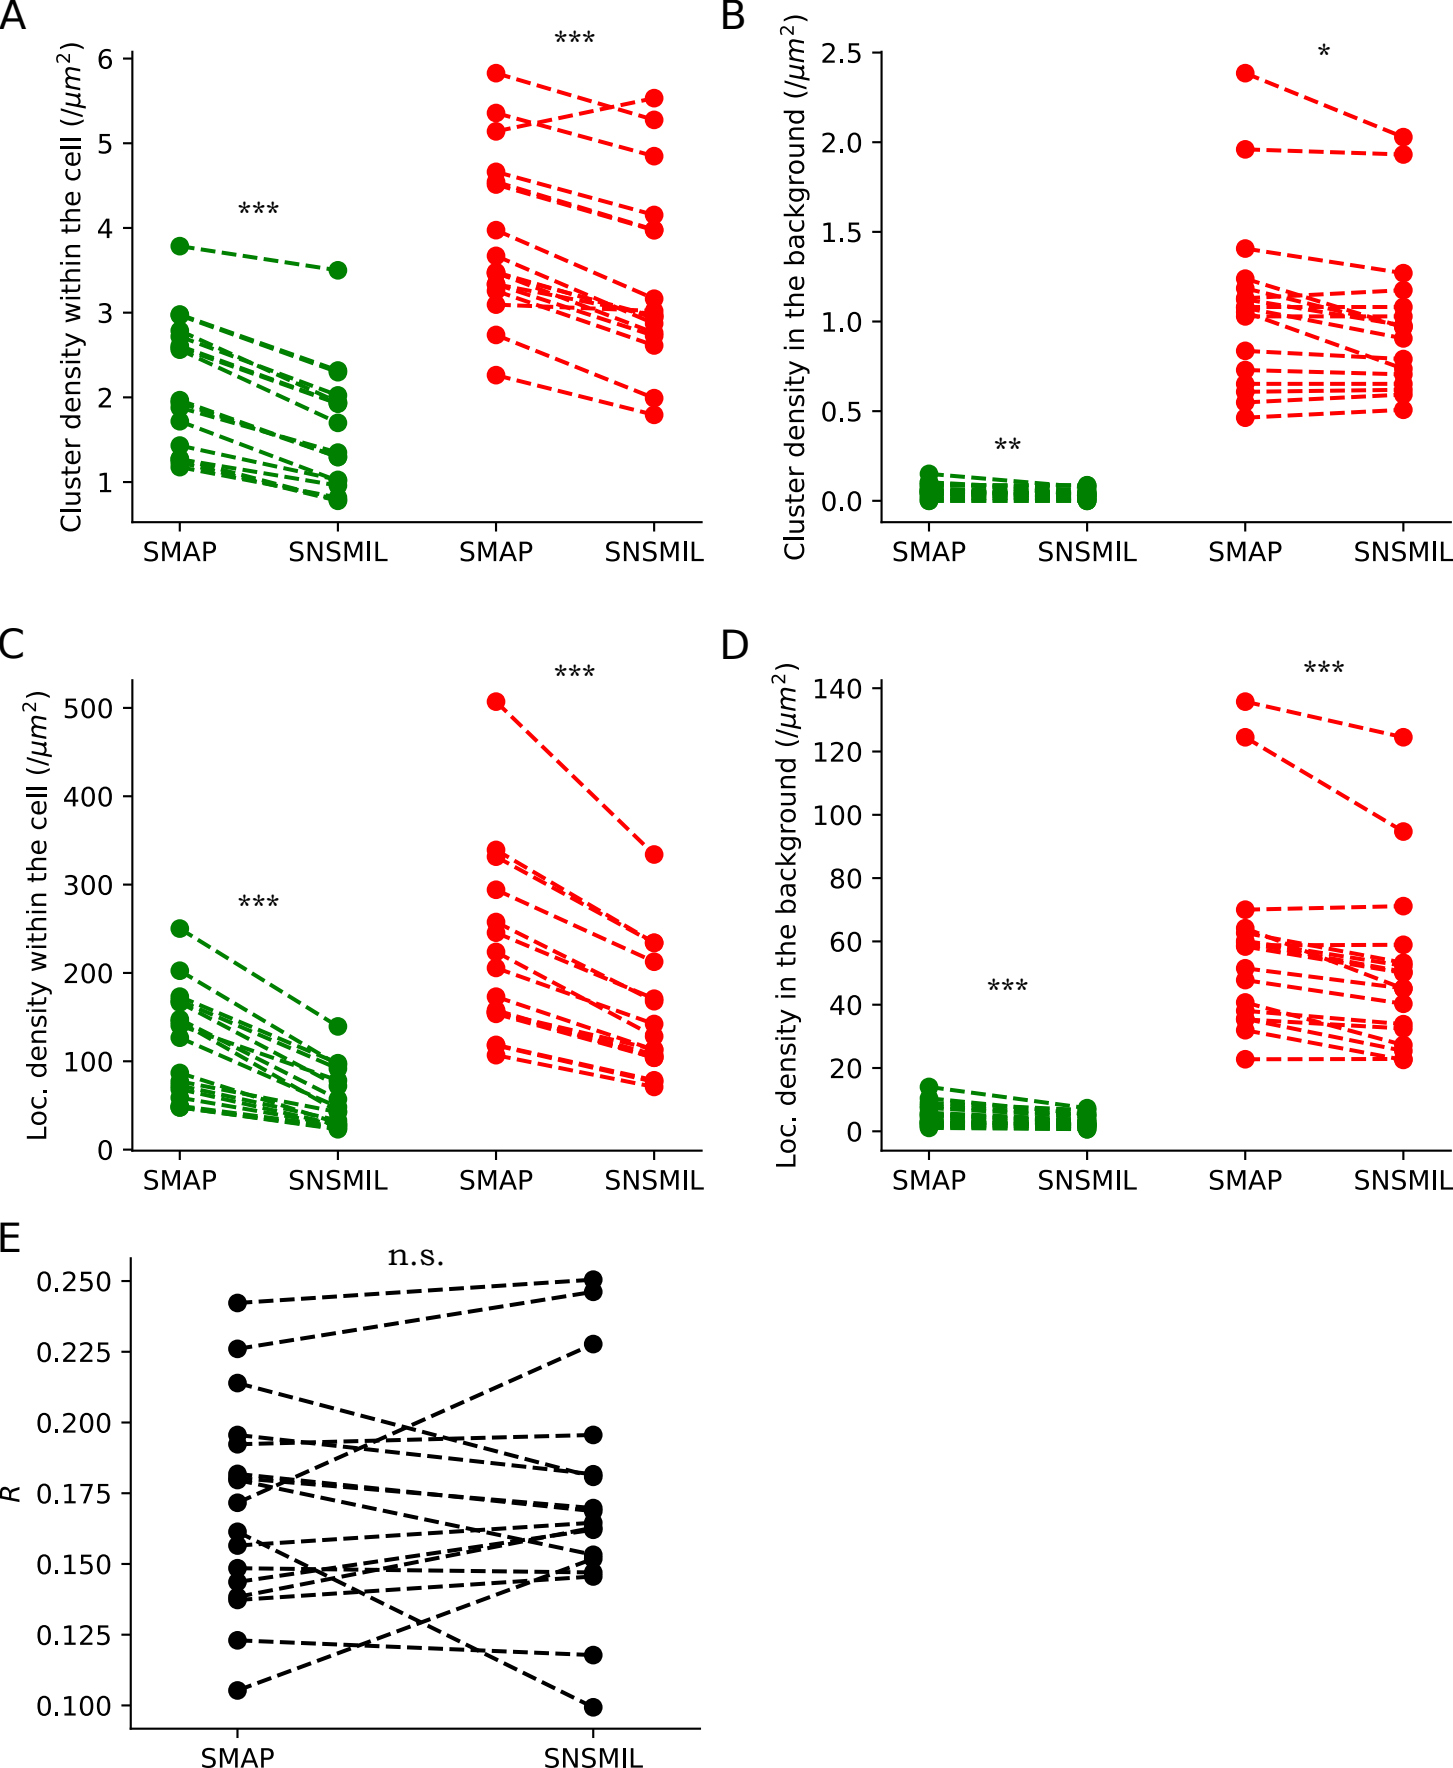

Supplement: supp [file elife_poa_e76631_Figure_5_figure_supplement_1.pdf › elife_poa_e76631_Figure_5_figure_supplement_1.pdf]
